# Supplementary material
Source: PubMed Central journal article supplement (PMC7305024)
Supplement: EMS86523-supplement-Appendix.pdf [file EMS86523-supplement-Appendix.pdf]

## Appendix A: Physical conditions and chemical abundances in TMC 1

Table A.1: TMC 1 physical conditions and chemical abundances

| Source name  | $T_{\text{dust}}$ (K) | $A_v$ (mag) | $T_{\text{gas}}$ (K) | $n_H$ ( $\text{cm}^{-3}$ ) | $N(^{13}\text{CS})$ ( $\text{cm}^{-2}$ ) <sup>a</sup> | $N(^{13}\text{CS}) / N(\text{H}_T)$ <sup>c</sup> | $N(\text{ortho} - \text{H}_2\text{S})$ ( $\text{cm}^{-2}$ ) | $N(\text{H}_2\text{S}) / N(\text{H}_T)$    |
|--------------|-----------------------|-------------|----------------------|----------------------------|-------------------------------------------------------|--------------------------------------------------|-------------------------------------------------------------|--------------------------------------------|
| TMC 1-CP+0   | 11.92                 | 18.20       | $9.7 \pm 0.8$        | $(3.0 \pm 0.8) \cdot 10^4$ | $(3.9 \pm 1.0) \cdot 10^{12}$                         | $(1.1 \pm 0.3) \cdot 10^{-10}$                   | $(3.1 \pm 0.9) \cdot 10^{13}$                               | $(1.1 \pm 0.3) \cdot 10^{-9}$              |
| TMC 1-CP+30  | 12.00                 | 16.71       | $10.2 \pm 0.2$       | $(4.6 \pm 0.4) \cdot 10^4$ | $(1.6 \pm 0.2) \cdot 10^{12}$                         | $(4.7 \pm 0.6) \cdot 10^{-11}$                   | $(5.1 \pm 1.4) \cdot 10^{13}$                               | $(2.0 \pm 0.6) \cdot 10^{-9}$              |
| TMC 1-CP+60  | 12.24                 | 13.74       | $11.3 \pm 2.2$       | $(7.6 \pm 3.8) \cdot 10^4$ | $(1.2 \pm 0.4) \cdot 10^{11}$                         | $(4.3 \pm 1.4) \cdot 10^{-11}$                   | $(1.2 \pm 0.6) \cdot 10^{13}$                               | $(5.7 \pm 0.3) \cdot 10^{-10}$             |
| TMC 1-CP+120 | 13.16                 | 7.27        | $12.5 \pm 1.3$       | $(3.0 \pm 0.8) \cdot 10^3$ | $(2.8 \pm 1.1) \cdot 10^{12}$                         | $(1.9 \pm 0.8) \cdot 10^{-10}$                   | $(5.5 \pm 1.6) \cdot 10^{13}$                               | $(5.1 \pm 1.4) \cdot 10^{-9}$              |
| TMC 1-CP+180 | 13.86                 | 4.77        | $16.0 \pm 2.6$       | $(5.4 \pm 1.6) \cdot 10^3$ | $(5.4 \pm 1.5) \cdot 10^{12}$                         | $(5.7 \pm 1.6) \cdot 10^{-11}$                   | $(4.3 \pm 1.3) \cdot 10^{13}$                               | $(5.9 \pm 1.8) \cdot 10^{-9}$              |
| TMC 1-CP+240 | 14.39                 | 3.25        | $14.7 \pm 1.1$       | $(3.2 \pm 2.0) \cdot 10^3$ | $(5.2 \pm 3.2) \cdot 10^{11}$                         | $(8.0 \pm 5.0) \cdot 10^{-12}$                   | $(2.1 \pm 1.3) \cdot 10^{13}$                               | $(4.2 \pm 2.1) \cdot 10^{-9}$ <sup>b</sup> |
| TMC 1-C+0    | 11.26                 | 19.85       | $8.5 \pm 2.0$        | $(9.2 \pm 6.8) \cdot 10^4$ | $(1.1 \pm 0.5) \cdot 10^{12}$                         | $(2.8 \pm 1.2) \cdot 10^{-11}$                   | $(2.0 \pm 1.5) \cdot 10^{13}$                               | $(6.0 \pm 4.9) \cdot 10^{-10}$             |
| TMC 1-C+30   | 11.32                 | 18.47       | $10.3 \pm 2.0$       | $(8.8 \pm 4.6) \cdot 10^4$ | $(7.0 \pm 3.9) \cdot 10^{11}$                         | $(1.9 \pm 1.1) \cdot 10^{-11}$                   | $(2.5 \pm 1.3) \cdot 10^{13}$                               | $(8.6 \pm 5.0) \cdot 10^{-10}$             |
| TMC 1-C+60   | 11.67                 | 13.34       | $11.6 \pm 2.2$       | $(2.4 \pm 1.0) \cdot 10^4$ | $(9.2 \pm 2.3) \cdot 10^{11}$                         | $(3.5 \pm 0.9) \cdot 10^{-11}$                   | $(5.4 \pm 2.0) \cdot 10^{13}$                               | $(2.6 \pm 1.0) \cdot 10^{-9}$              |
| TMC 1-C+120  | 13.13                 | 4.79        | $11.1 \pm 1.9$       | $(1.1 \pm 0.5) \cdot 10^4$ | $(6.2 \pm 1.8) \cdot 10^{11}$                         | $(6.5 \pm 1.9) \cdot 10^{-11}$                   | $(1.0 \pm 0.5) \cdot 10^{13}$                               | $(1.4 \pm 0.6) \cdot 10^{-8}$              |
| TMC 1-C+180  | 14.08                 | 2.20        | $13.5 \pm 1.1$       | $(1.1 \pm 2.8) \cdot 10^4$ | $(1.8 \pm 0.9) \cdot 10^{11}$                         | $(4.1 \pm 2.1) \cdot 10^{-11}$                   | $(6.5 \pm 3.3) \cdot 10^{12}$ <sup>b</sup>                  | $(1.9 \pm 1.0) \cdot 10^{-9}$ <sup>b</sup> |
| TMC 1-C+240  | 14.53                 | 1.63        | $13.5 \pm 2.7$       | $(5.2 \pm 1.8) \cdot 10^3$ | $(1.6 \pm 1.0) \cdot 10^{11}$                         | $(4.9 \pm 3.0) \cdot 10^{-11}$                   | $(1.5 \pm 1.0) \cdot 10^{13}$ <sup>b</sup>                  | $(6.0 \pm 4.2) \cdot 10^{-9}$ <sup>b</sup> |

**Notes:**

<sup>a</sup> When  $^{13}\text{CS}$  or  $\text{C}^{34}\text{S}$  isotopologues are not detected,  $^{13}\text{CS}$  column densities are determined from that of  $\text{C}^{34}\text{S}$  or  $\text{CS}$ , applying the ratios  $\text{CS}/^{13}\text{CS} \approx 60$  and  $\text{C}^{34}\text{S}/^{13}\text{CS} \approx 8/3$ .

<sup>b</sup> Upper bound values.

<sup>c</sup>  $N(\text{H}_T)$  stands for the total hydrogen column density:  $N(\text{H}_T) = N(\text{H}) + 2 N(\text{H}_2)$ .

Appendix A.1: TMC 1-C spectra

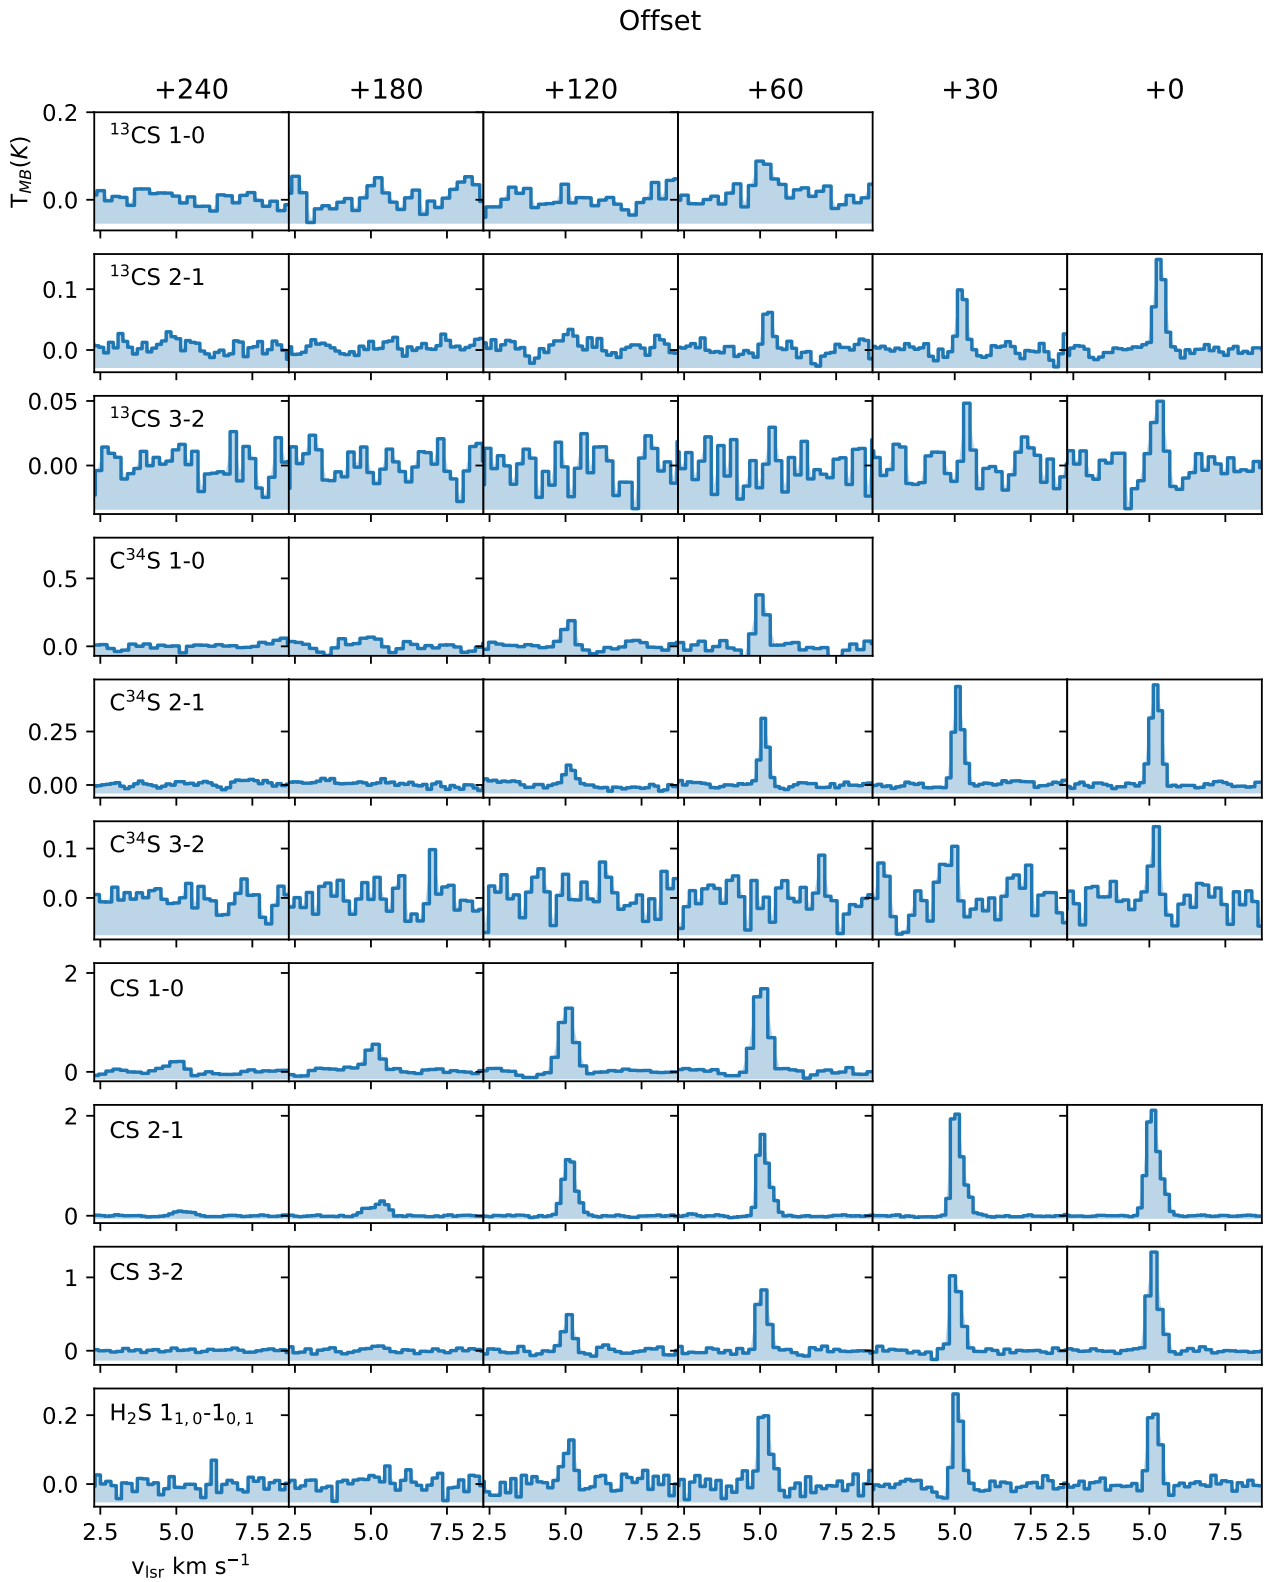

Fig. A.1: Single dish spectra of  $^{13}\text{CS } 1 \rightarrow 0$ ,  $^{13}\text{CS } 2 \rightarrow 1$ ,  $^{13}\text{CS } 3 \rightarrow 2$ ,  $\text{C}^{34}\text{S } 1 \rightarrow 0$ ,  $\text{C}^{34}\text{S } 2 \rightarrow 1$ ,  $\text{C}^{34}\text{S } 3 \rightarrow 2$ ,  $\text{CS } 1 \rightarrow 0$ ,  $\text{CS } 2 \rightarrow 1$ ,  $\text{C}^{34}\text{S } 3 \rightarrow 2$  transitions towards TMC 1-C positions with offsets  $(+0'', 0'')$ ,  $(+30'', 0'')$ ,  $(+60'', 0'')$ ,  $(+120'', 0'')$ ,  $(+180'', 0'')$ ,  $(+240'', 0'')$ . The systemic velocity is  $v_{LSR} = 6.5 \text{ km s}^{-1}$ .

Appendix A.2: TMC 1-CP spectra

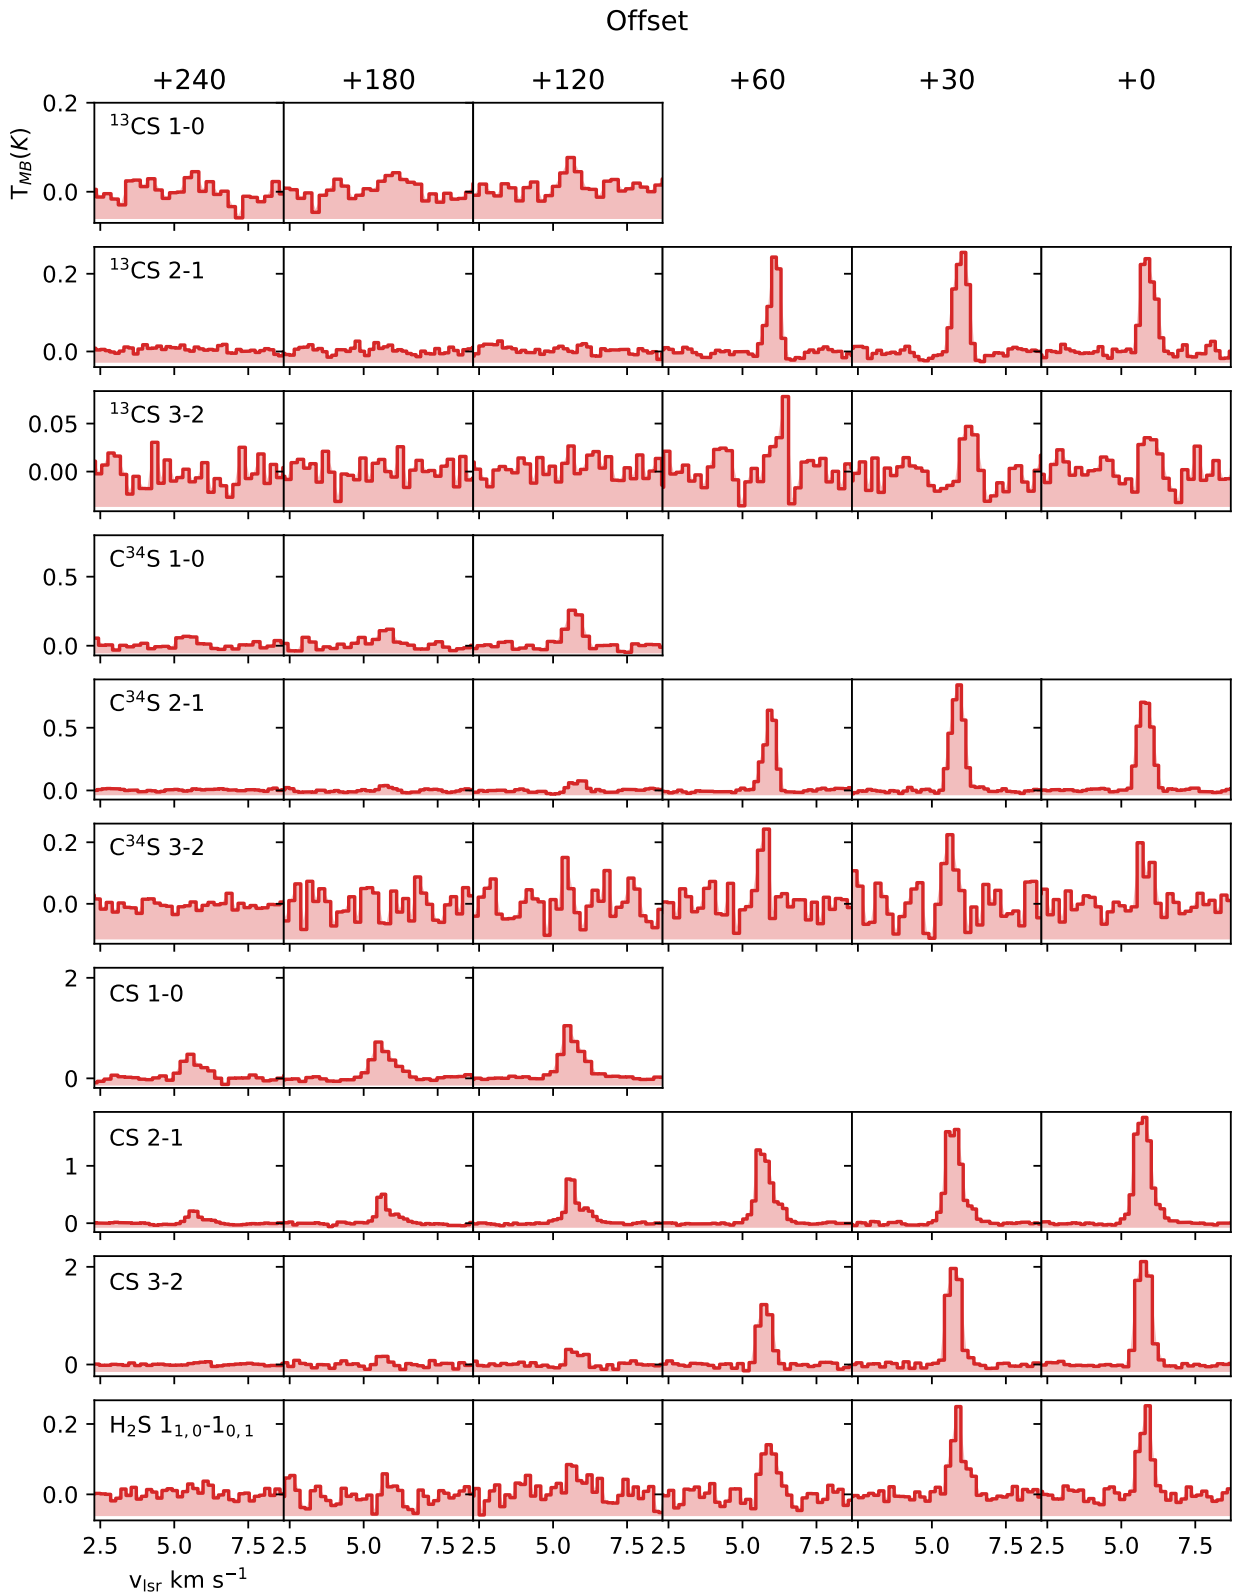

Fig. A.2: Single dish spectra of  $^{13}\text{CS } 1 \rightarrow 0$ ,  $^{13}\text{CS } 2 \rightarrow 1$ ,  $^{13}\text{CS } 3 \rightarrow 2$ ,  $\text{C}^{34}\text{S } 1 \rightarrow 0$ ,  $\text{C}^{34}\text{S } 2 \rightarrow 1$ ,  $\text{C}^{34}\text{S } 3 \rightarrow 2$  transitions towards TMC 1-CP positions with offsets  $(+0'', 0'')$ ,  $(+30'', 0'')$ ,  $(+60'', 0'')$ ,  $(+120'', 0'')$ ,  $(+180'', 0'')$ ,  $(+240'', 0'')$ . The systemic velocity is  $v_{lsr} = 6.5 \text{ km s}^{-1}$ .

## Appendix B: Physical conditions and chemical abundances in Barnard 1b

Table B.1: Barnard 1b physical conditions.  $^{13}\text{CS}$  and  $\text{H}_2\text{S}$  abundances.

| Source name   | $T_{\text{dust}}$ (K) | $A_v$ (mag) | $T_{\text{gas}}$ (K) | $n_H$ ( $\text{cm}^{-3}$ ) | $N(^{13}\text{CS})$ ( $\text{cm}^{-2}$ ) <sup>a</sup> | $N(^{13}\text{CS})/N(\text{H}_T)$ | $N(\text{ortho} - \text{H}_2\text{S})(\text{cm}^{-2})$ | $N(\text{H}_2\text{S})/N(\text{H}_T)$      |
|---------------|-----------------------|-------------|----------------------|----------------------------|-------------------------------------------------------|-----------------------------------|--------------------------------------------------------|--------------------------------------------|
| B1B-cal-0_0   | 11.90                 | 76.00       | $9.8 \pm 1.4$        | $(6.3 \pm 3.0) \cdot 10^5$ | $(2.0 \pm 1.6) \cdot 10^{12}$                         | $(2.6 \pm 2.1) \cdot 10^{-11}$    | $(5.2 \pm 2.5) \cdot 10^{13}$                          | $(4.5 \pm 2.1) \cdot 10^{-10}$             |
| B1B-cal-10_0  | 11.72                 | 59.80       | $10.1 \pm 1.5$       | $(4.2 \pm 2.8) \cdot 10^5$ | $(1.3 \pm 0.9) \cdot 10^{12}$                         | $(2.2 \pm 1.5) \cdot 10^{-11}$    | $(1.8 \pm 1.2) \cdot 10^{14}$ <sup>c</sup>             | $(1.9 \pm 1.2) \cdot 10^{-9}$ <sup>c</sup> |
| B1B-cal-20_0  | 11.72                 | 45.80       | $10.9 \pm 1.7$       | $(1.6 \pm 0.9) \cdot 10^5$ | $(1.9 \pm 1.2) \cdot 10^{12}$                         | $(4.0 \pm 2.6) \cdot 10^{-11}$    | $(3.2 \pm 2.1) \cdot 10^{14}$ <sup>c</sup>             | $(4.5 \pm 2.9) \cdot 10^{-9}$ <sup>c</sup> |
| B1B-cal-30_0  | 11.54                 | 38.70       | $11.9 \pm 1.0$       | $(1.0 \pm 0.4) \cdot 10^5$ | $(1.1 \pm 0.5) \cdot 10^{12}$                         | $(2.8 \pm 1.2) \cdot 10^{-11}$    | $(3.1 \pm 1.4) \cdot 10^{14}$                          | $(5.2 \pm 2.3) \cdot 10^{-9}$              |
| B1B-cal-40_0  | 11.54                 | 28.39       | $12.1 \pm 1.1$       | $(1.0 \pm 0.4) \cdot 10^5$ | $(9.5 \pm 4.4) \cdot 10^{11}$                         | $(3.3 \pm 1.6) \cdot 10^{-11}$    | $(2.0 \pm 0.9) \cdot 10^{13}$                          | $(4.5 \pm 2.0) \cdot 10^{-9}$              |
| B1B-cal-50_0  | 12.39                 | 20.00       | $13.2 \pm 1.3$       | $(4.7 \pm 2.2) \cdot 10^4$ | $(1.7 \pm 0.8) \cdot 10^{11}$                         | $(8.7 \pm 4.2) \cdot 10^{-11}$    | $(1.9 \pm 0.9) \cdot 10^{13}$                          | $(6.0 \pm 2.9) \cdot 10^{-9}$              |
| B1B-cal-60_0  | 12.67                 | 20.00       | $12.3 \pm 0.9$       | $(3.1 \pm 1.6) \cdot 10^4$ | $(2.2 \pm 1.1) \cdot 10^{12}$                         | $(1.1 \pm 0.5) \cdot 10^{-10}$    | $(3.4 \pm 1.7) \cdot 10^{14}$                          | $(1.1 \pm 0.6) \cdot 10^{-8}$              |
| B1B-cal-80_0  | 13.24                 | 17.05       | $13.2 \pm 1.8$       | $(5.5 \pm 2.4) \cdot 10^4$ | $(1.0 \pm 0.3) \cdot 10^{12}$                         | $(6.1 \pm 1.8) \cdot 10^{-11}$    | $(1.0 \pm 0.4) \cdot 10^{14}$                          | $(3.9 \pm 1.7) \cdot 10^{-9}$              |
| B1B-cal-110_0 | 13.98                 | 14.46       | $14.4 \pm 1.9$       | $(5.2 \pm 2.1) \cdot 10^4$ | $(9.8 \pm 2.7) \cdot 10^{11}$                         | $(6.8 \pm 1.9) \cdot 10^{-11}$    | $(8.2 \pm 3.3) \cdot 10^{13}$                          | $(3.7 \pm 1.5) \cdot 10^{-9}$              |
| B1B-cal-140_0 | 14.53                 | 11.87       | $14.2 \pm 1.0$       | $(9.5 \pm 2.5) \cdot 10^3$ | $(5.4 \pm 2.7) \cdot 10^{12}$                         | $(4.5 \pm 2.3) \cdot 10^{-10}$    | $(8.3 \pm 2.2) \cdot 10^{14}$                          | $(4.5 \pm 1.2) \cdot 10^{-8}$              |
| B1B-cal-180_0 | 16.21                 | 8.57        | $15.3 \pm 1.2$       | $(3.6 \pm 1.7) \cdot 10^3$ | $(6.2 \pm 3.3) \cdot 10^{12}$                         | $(7.3 \pm 3.9) \cdot 10^{-10}$    | $(4.2 \pm 2.0) \cdot 10^{14}$                          | $(3.2 \pm 1.5) \cdot 10^{-8}$              |
| B1B-cal-240_0 | 16.70                 | 6.16        | $16.4 \pm 1.0$       | $(3.8 \pm 1.8) \cdot 10^3$ | $(1.6 \pm 0.8) \cdot 10^{12}$                         | $(2.6 \pm 1.4) \cdot 10^{-10}$    | $(1.5 \pm 0.7) \cdot 10^{14}$                          | $(1.6 \pm 0.8) \cdot 10^{-8}$              |
| B1B-cal-500_0 | 18.23                 | 3.44        | $18.0 \pm 5.4$       | $(9.6 \pm 2.2) \cdot 10^2$ | $(5.5 \pm 3.0) \cdot 10^{11}$                         | $(1.6 \pm 0.9) \cdot 10^{-10}$    | $(1.8 \pm 0.4) \cdot 10^{13}$ <sup>b</sup>             | $(3.4 \pm 0.8) \cdot 10^{-9}$ <sup>b</sup> |

### Notes

<sup>a</sup> When  $^{13}\text{CS}$  or  $\text{C}^{34}\text{S}$  isotopologues are not detected,  $^{13}\text{CS}$  column densities are determined from that of  $\text{C}^{34}\text{S}$  or  $\text{CS}$ , applying the isotopic ratios  $\text{CS}/^{13}\text{CS} \approx 60$  and  $\text{C}^{34}\text{S}/^{13}\text{CS} \approx 8/3$ .

<sup>b</sup> Upper bound values.

<sup>c</sup> Column densities are obtained from that of the isotopologue  $\text{H}_2^{34}\text{S}$ , using  $\text{H}_2\text{S}/\text{H}_2^{34}\text{S} \approx 22.5$ .

Table B.2: Barnard 1b physical conditions and SO abundances.

| Source name   | $T_{\text{dust}}$ (K) | $A_v$ (mag) | $T_{\text{gas}}$ (K) | $n_H$ ( $\text{cm}^{-3}$ ) | $N(\text{SO})$ ( $\text{cm}^{-2}$ )      | $N(\text{SO}) / N(\text{H}_T)$            |
|---------------|-----------------------|-------------|----------------------|----------------------------|------------------------------------------|-------------------------------------------|
| B1B-cal-0_0   | 11.90                 | 76.00       | $9.8 \pm 1.4$        | $(6.3 \pm 3.0) \cdot 10^5$ | $(2.4 \pm 0.6) \cdot 10^{14}$            | $(1.5 \pm 0.4) \cdot 10^{-9}$             |
| B1B-cal-10_0  | 11.72                 | 59.80       | $10.1 \pm 1.5$       | $(4.2 \pm 2.8) \cdot 10^5$ | $(2.5 \pm 0.9) \cdot 10^{14}$            | $(2.1 \pm 0.8) \cdot 10^{-9}$             |
| B1B-cal-20_0  | 11.72                 | 45.80       | $10.9 \pm 1.7$       | $(1.6 \pm 0.9) \cdot 10^5$ | $(2.7 \pm 1.0) \cdot 10^{14}$            | $(2.9 \pm 1.1) \cdot 10^{-9}$             |
| B1B-cal-30_0  | 11.54                 | 38.70       | $11.9 \pm 1.0$       | $(1.0 \pm 0.4) \cdot 10^5$ | $(2.4 \pm 1.6) \cdot 10^{14}$            | $(3.2 \pm 2.1) \cdot 10^{-9}$             |
| B1B-cal-40_0  | 11.54                 | 28.39       | $12.1 \pm 1.0$       | $(1.0 \pm 0.4) \cdot 10^5$ | $(9.9 \pm 4.5) \cdot 10^{13}$            | $(1.7 \pm 0.8) \cdot 10^{-9}$             |
| B1B-cal-50_0  | 12.39                 | 20.00       | $13.2 \pm 1.0$       | $(4.7 \pm 2.2) \cdot 10^4$ | $(5.2 \pm 1.7) \cdot 10^{13}$            | $(1.3 \pm 0.4) \cdot 10^{-9}$             |
| B1B-cal-60_0  | 12.67                 | 20.00       | $12.3 \pm 1.0$       | $(3.1 \pm 1.6) \cdot 10^4$ | $(4.8 \pm 1.6) \cdot 10^{13}$            | $(1.2 \pm 0.4) \cdot 10^{-9}$             |
| B1B-cal-80_0  | 13.24                 | 17.05       | $13.2 \pm 1.8$       | $(5.5 \pm 2.4) \cdot 10^4$ | $(2.2 \pm 0.8) \cdot 10^{13}$            | $(6.5 \pm 2.3) \cdot 10^{-10}$            |
| B1B-cal-110_0 | 13.98                 | 14.46       | $14.4 \pm 1.9$       | $(5.2 \pm 2.1) \cdot 10^4$ | $(3.4 \pm 1.9) \cdot 10^{13}$            | $(1.2 \pm 0.7) \cdot 10^{-9}$             |
| B1B-cal-140_0 | 14.53                 | 11.87       | $14.2 \pm 1.0$       | $(9.5 \pm 2.5) \cdot 10^3$ | $(4.2 \pm 2.2) \cdot 10^{13}$            | $(1.8 \pm 0.9) \cdot 10^{-9}$             |
| B1B-cal-180_0 | 16.21                 | 8.57        | $15.3 \pm 1.2$       | $(3.6 \pm 1.7) \cdot 10^3$ | $(4.9 \pm 2.4) \cdot 10^{13}$            | $(2.9 \pm 1.4) \cdot 10^{-9}$             |
| B1B-cal-240_0 | 16.70                 | 6.16        | $16.4 \pm 1.0$       | $(3.8 \pm 1.8) \cdot 10^3$ | $(4.9 \pm 2.6) \cdot 10^{13}$            | $(4.0 \pm 2.1) \cdot 10^{-9}$             |
| B1B-cal-500_0 | 18.23                 | 3.44        | $18.0 \pm 5.4$       | $(9.6 \pm 2.2) \cdot 10^2$ | $(1.5 \pm 0.3) \cdot 10^{12} \text{ }^a$ | $(2.2 \pm 0.5) \cdot 10^{-10} \text{ }^a$ |

**Notes**

<sup>a</sup> Upper bound values

Appendix B.1: Barnard 1b spectra

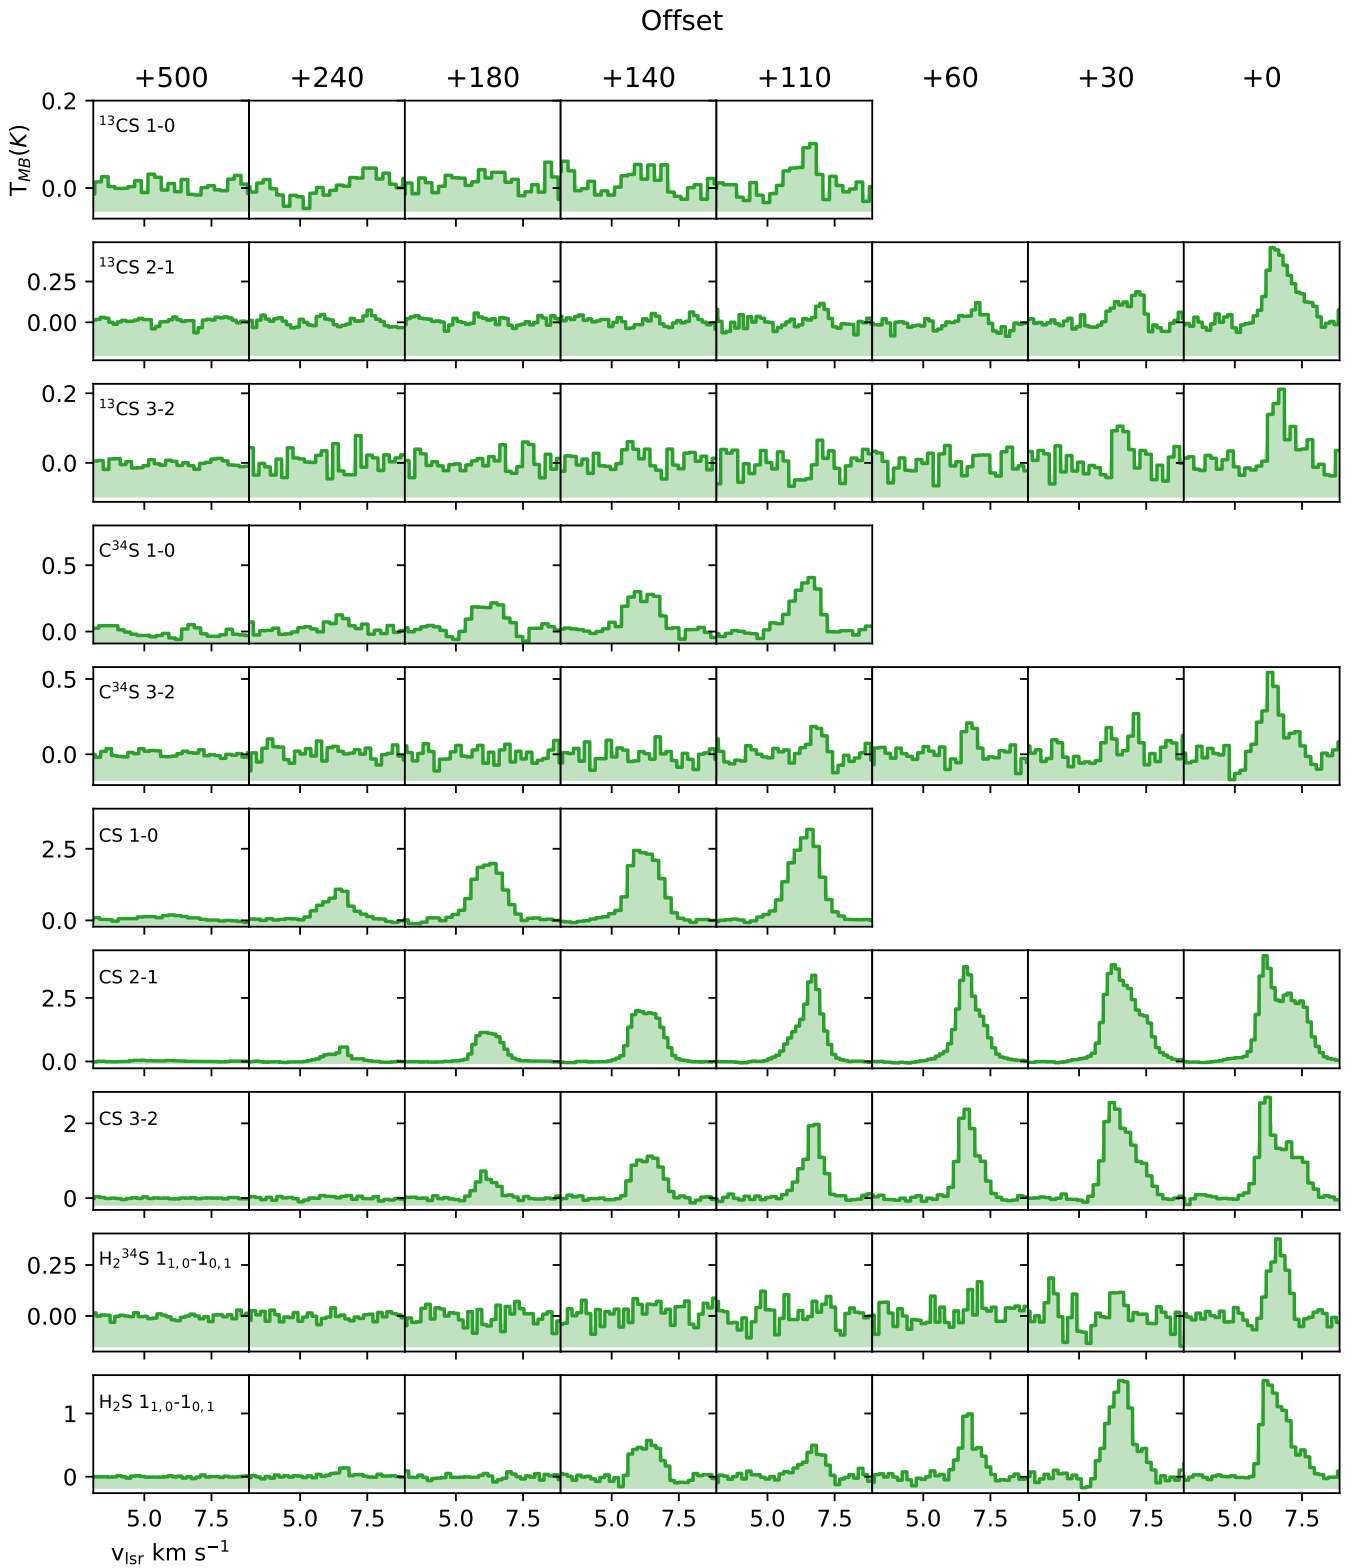

Fig. B.1: Single dish spectra of  $^{13}\text{CS } 1 \rightarrow 0$ ,  $^{13}\text{CS } 2 \rightarrow 1$ ,  $^{13}\text{CS } 3 \rightarrow 2$ ,  $\text{C}^{34}\text{S } 1 \rightarrow 0$ ,  $\text{C}^{34}\text{S } 2 \rightarrow 1$ ,  $\text{C}^{34}\text{S } 3 \rightarrow 2$ ,  $\text{CS } 1 \rightarrow 0$ ,  $\text{CS } 2 \rightarrow 1$ ,  $\text{C}^{34}\text{S } 3 \rightarrow 2$  transitions towards positions with offsets  $(+0'', 0'')$ ,  $(+30'', 0'')$ ,  $(+60'', 0'')$ ,  $(+120'', 0'')$ ,  $(+180'', 0'')$ ,  $(+240'', 0'')$  in the Barnard 1b filament. The systemic velocity is  $v_{\text{lsr}} = 6.5 \text{ km s}^{-1}$ .
